# Supplementary material
Source: Springer Nature journal article supplement (https://www.springermedizin.de/resource/supplementary/12883_2008_233_MOESM1_ESM.pdf/9457142)
Supplement: MOESM1 [file 9457142]

### Monofocal

### MRI findings at screening

### Multifocal

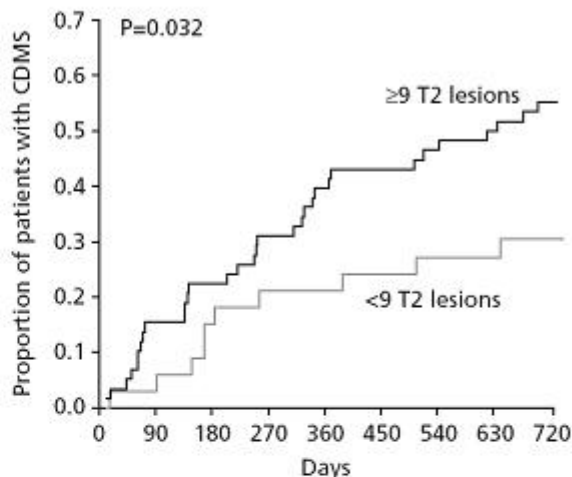

|                         |    |    |    |    |   |
|-------------------------|----|----|----|----|---|
| at risk: < 9 T2 lesions | 34 | 28 | 26 | 22 | 6 |
| at risk: ≥ 9 T2 lesions | 59 | 45 | 35 | 30 | 2 |

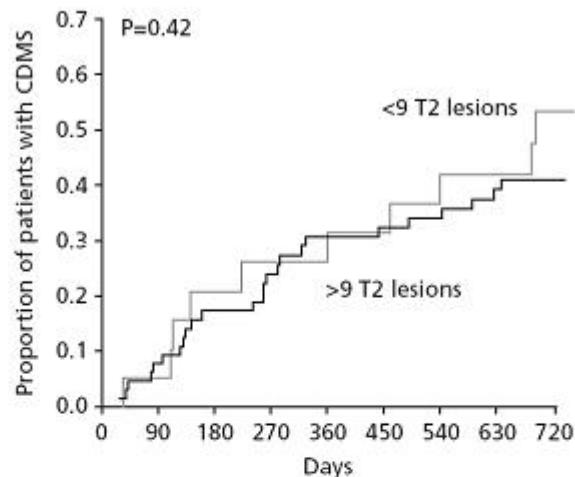

|                         |    |    |    |    |    |
|-------------------------|----|----|----|----|----|
| at risk: < 9 T2 lesions | 19 | 15 | 13 | 11 | 2  |
| at risk: > 9 T2 lesions | 64 | 51 | 41 | 38 | 14 |

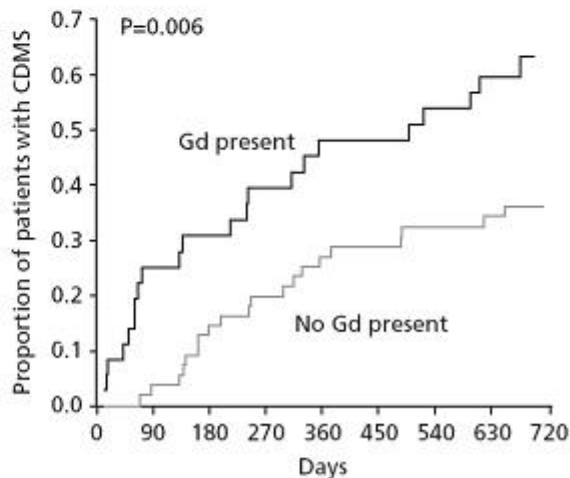

|                        |    |    |    |    |   |
|------------------------|----|----|----|----|---|
| at risk: no Gd present | 56 | 49 | 42 | 36 | 7 |
| at risk: Gd present    | 37 | 24 | 19 | 16 | 1 |

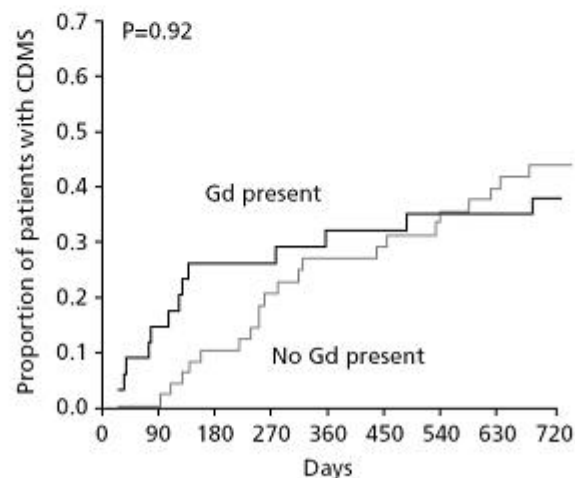

|                        |    |    |    |    |   |
|------------------------|----|----|----|----|---|
| at risk: no Gd present | 47 | 42 | 32 | 28 | 8 |
| at risk: Gd present    | 33 | 23 | 21 | 20 | 8 |
